# Supplementary material for: Light-Responsive Soft Robot Integrating Actuation and Function Based on Laser Cutting
Source: Micromachines (Basel). 2024 Apr 16;15(4):534. doi: 10.3390/mi15040534 (PMC11051773; doi:10.3390/mi15040534)
Supplement: Supplementary file 1 [file micromachines-15-00534-s001.zip]

Archive with 5 entries (5 files):
- Movie S1.mp4
- Movie S2.mp4
- Movie S3.mp4
- Movie S4.mp4
- Supporting Information.pdf
